# Supplementary material
Source: Springer Nature journal article supplement (https://www.springermedizin.de/resource/supplementary/13012_2012_601_MOESM10_ESM.pdf/9630364)
Supplement: MOESM10 [file 9630364]

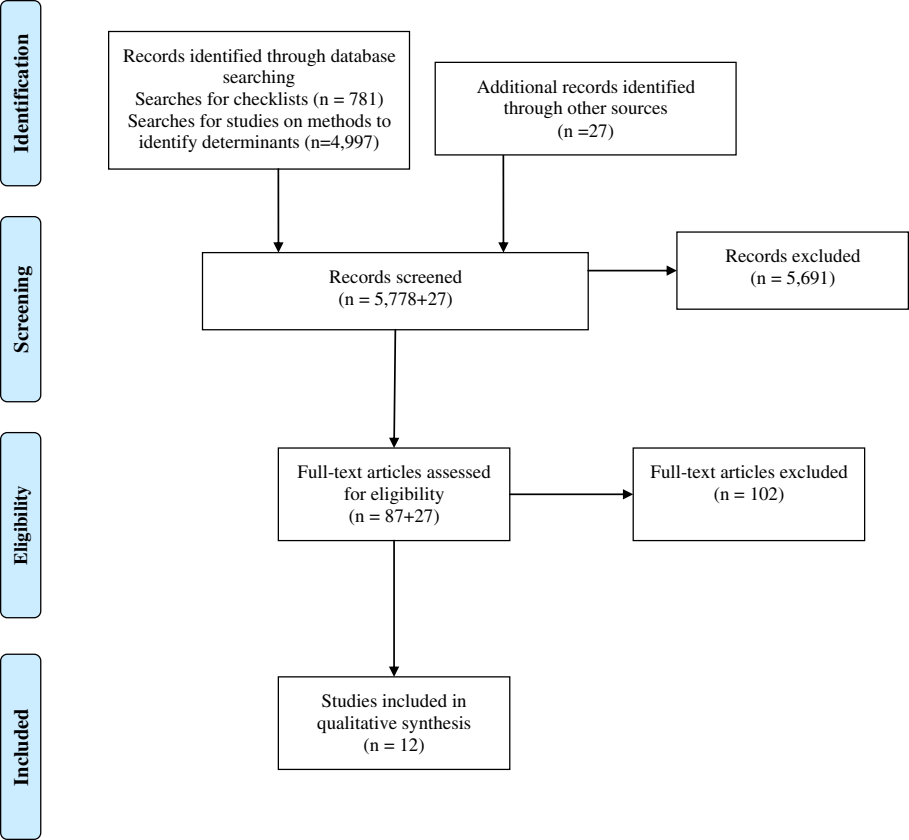

Identification

Records identified through database searching  
Searches for checklists (n = 781)  
Searches for studies on methods to identify determinants (n=4,997)

Additional records identified through other sources (n = 27)

Screening

Records screened (n = 5,778+27)

Records excluded (n = 5,691)

Eligibility

Full-text articles assessed for eligibility (n = 87+27)

Full-text articles excluded (n = 102)

Included

Studies included in qualitative synthesis (n = 12)
